# Supplementary material
Source: PubMed Central journal article supplement (PMC6402808)

**A**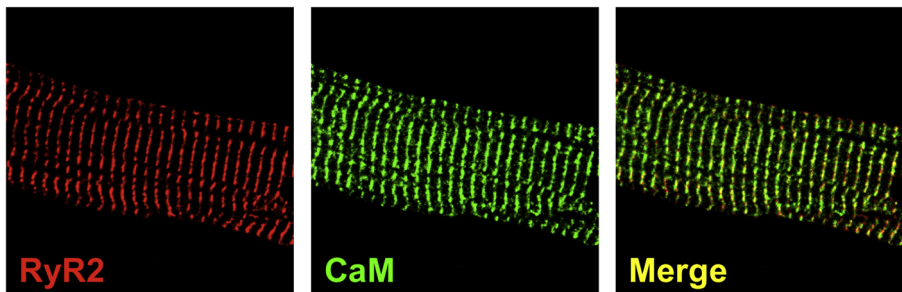**B**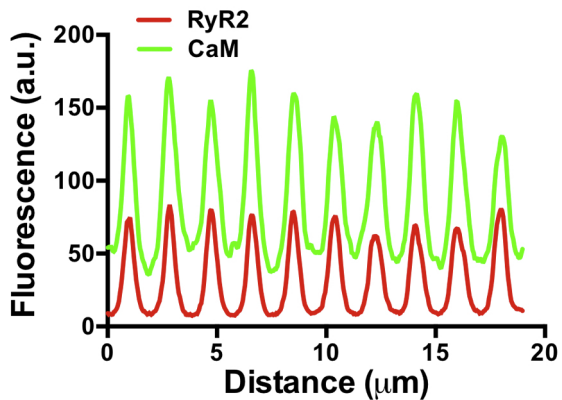

Figure 9

**A****Suramin (-)**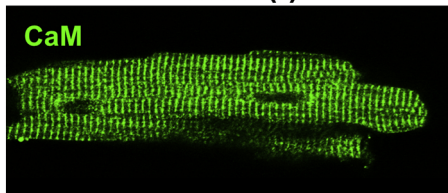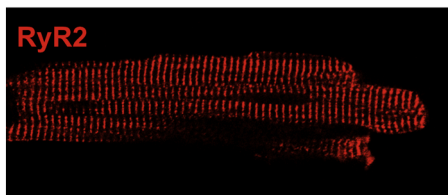**Suramin (+)**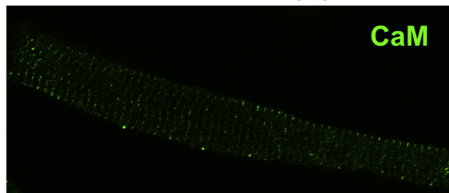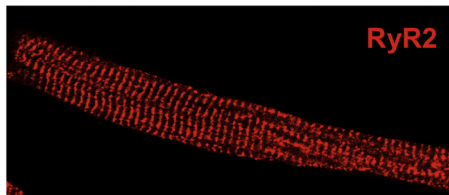**B****Suramin (-)**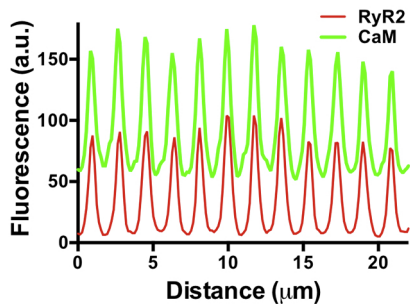**Suramin (+)**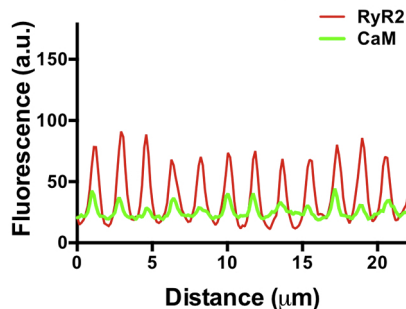

Figure 10

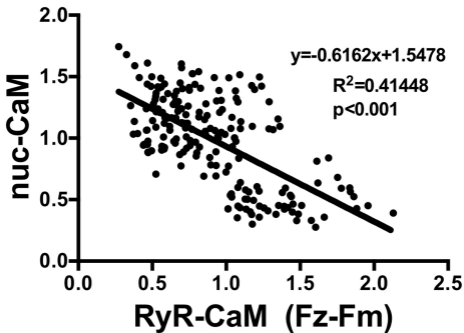

Figure 11

**A**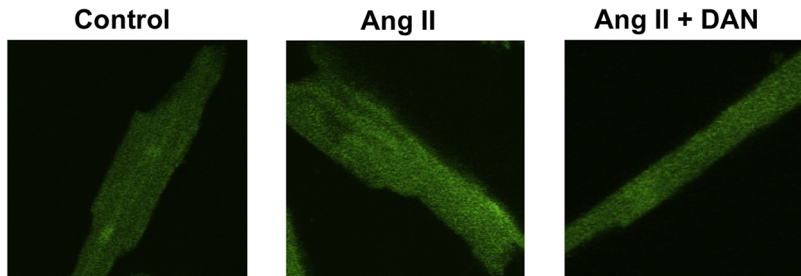**B**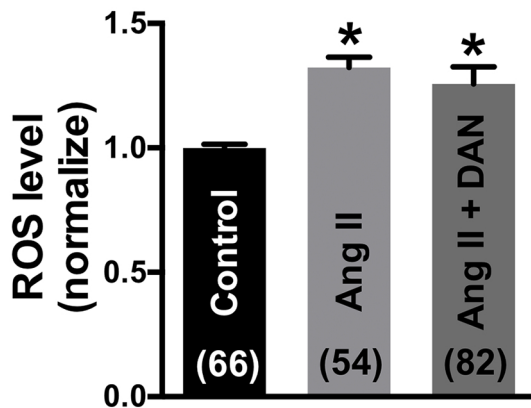

Figure 12

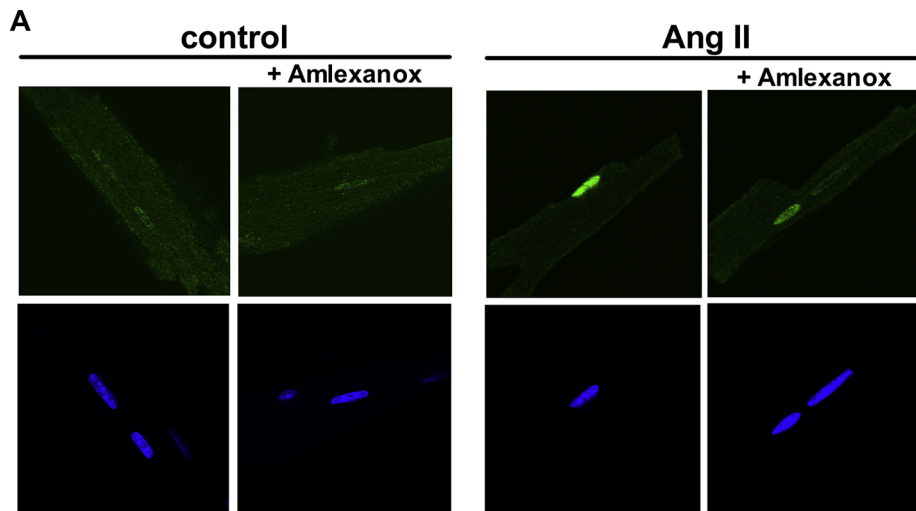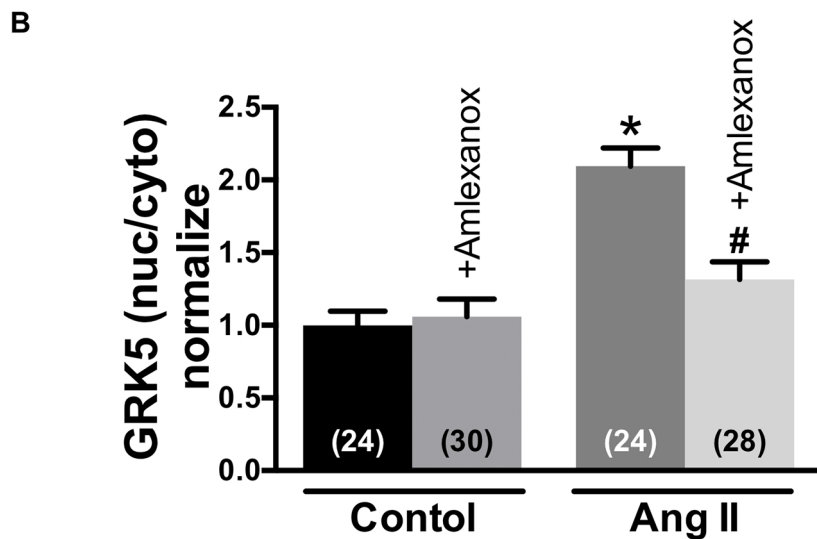

Figure 13

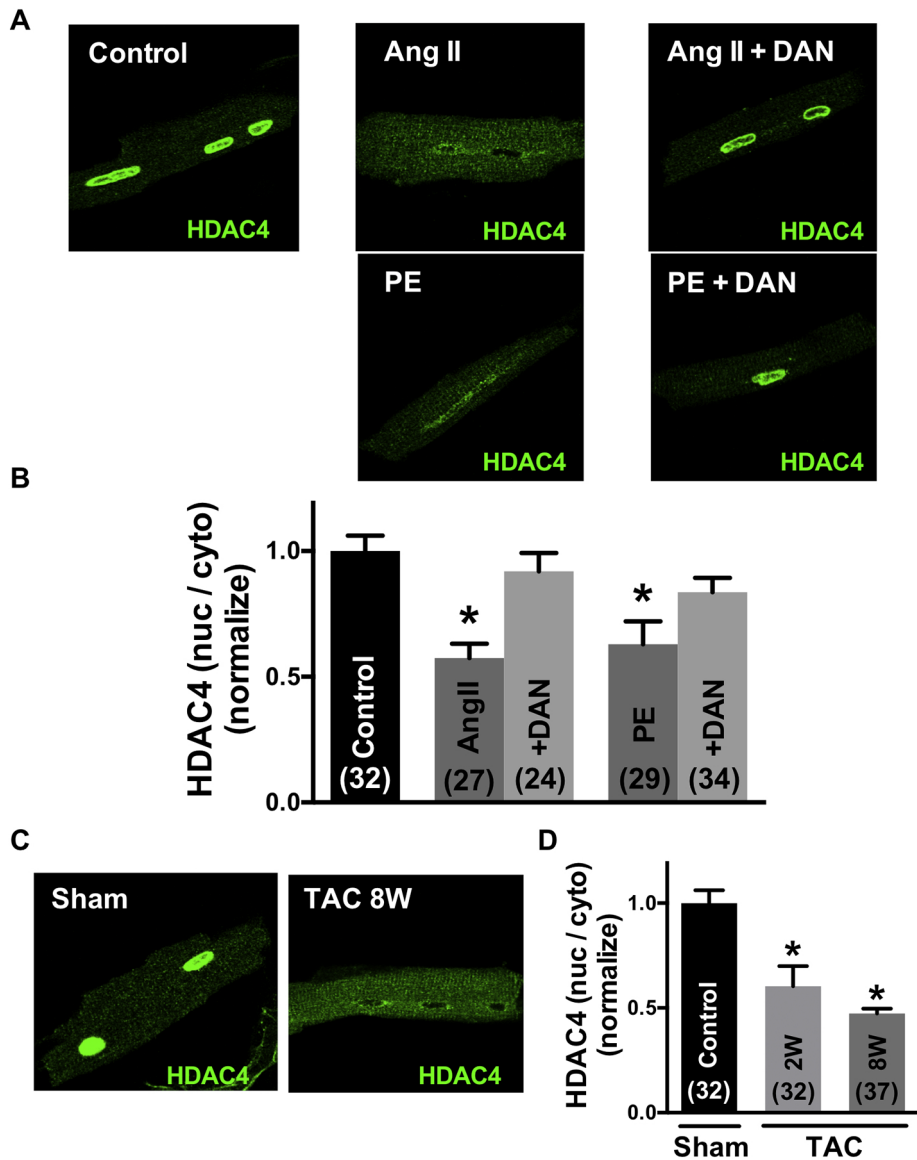

Figure 14

**A**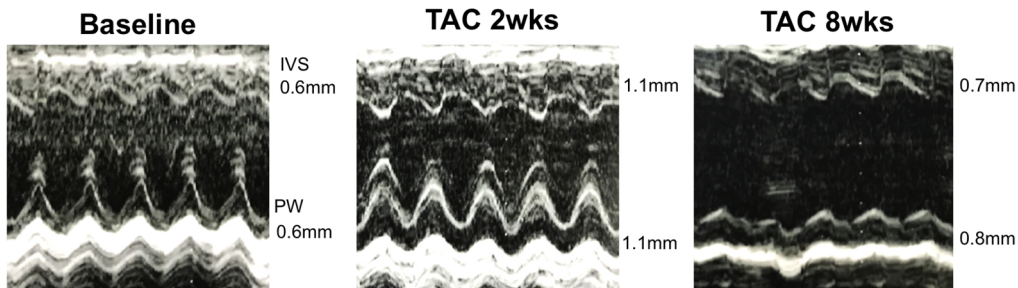**B**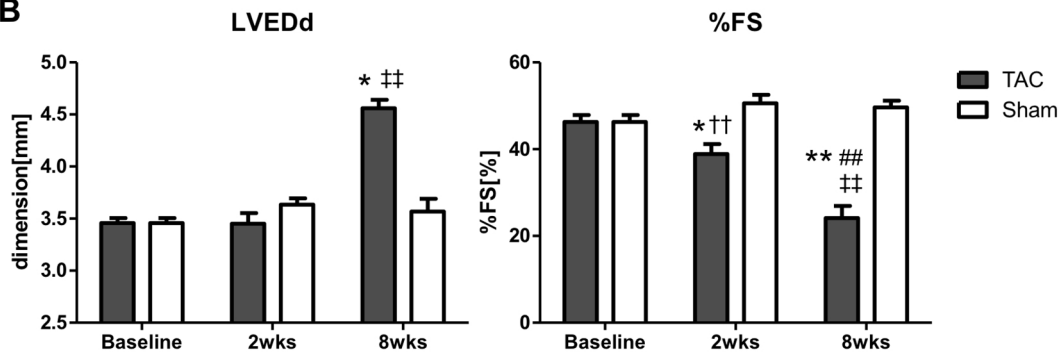**C**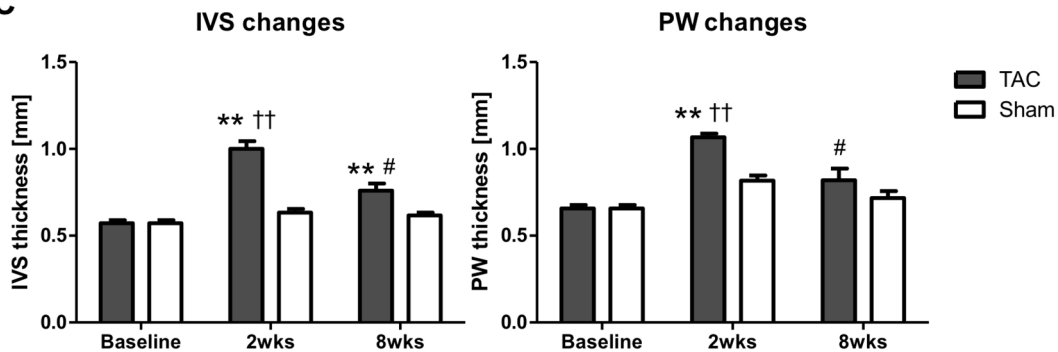

Figure 15

Supplement: NIHMS1511669-supplement-2.pdf [file NIHMS1511669-supplement-2.pdf]
